# Supplementary material
Source: PubMed Central journal article supplement (PMC4118426)
Supplement: NIHMS598896-supplement-SDC_2.pdf [file NIHMS598896-supplement-SDC_2.pdf]

## SUPPLEMENTAL MATERIAL

### Supplemental Methods

#### *Fractional shortening and $Ca^{2+}$ transient measurements in isolated cardiomyocytes*

Explanted hearts were placed in ice-cold  $Ca^{2+}$  free Krebs-Henseleit buffer (KHB) containing (in mmol/L) 12.5 glucose, 5.4 KCl, 1 lactic acid, 1.2  $MgSO_4$ , 130 NaCl, 1.2  $NaH_2PO_4$ , 25  $NaHCO_3$ , and 2 Na-pyruvate (pH 7.4 with NaOH). A small catheter was placed into the lumen of the LAD coronary artery that supplied the free-wall region of the left ventricle. The perfused myocardial region was cut out from the heart and rinsed for 15 minutes with non-recirculating KHB with 10 mM taurine and the perfusion maintained for 30 -45 minutes with recirculating KHB containing 180 U/mL collagenase (Worthington, type 2), 20mM 2,3 butanedione monoxime (BDM), 20mM taurine, and 0.05mM  $CaCl_2$ . The softened myocardial tissue was then removed from the cannula and minced to dissociate myocytes from the mid-myocardial layer. The resulting cell suspension was filtered and the myocytes were allowed to settle by gravity. The supernatant was removed and the cells were resuspended in KHB containing 1% weight/volume bovine serum albumin (BSA), 10 mM taurine, and 0.25 mM  $CaCl_2$  and then oxygenated for 2-3 hours with 95%  $O_2$  + 5%  $CO_2$ . The temperature of all solutions was kept at 37°C throughout the isolation procedure and all solutions were equilibrated with 95%  $O_2$  and 5%  $CO_2$ . All experiments were conducted within 3 hours from cell isolation.

Fractional shortening and  $Ca^{2+}$  transients were measured as previously described (29-30). Myocytes were loaded with 5-10  $\mu M$  Fluo-4 AM (Molecular Probes) and placed in a heated chamber (35°C) on the stage of an inverted microscope and perfused with a normal

physiological Tyrode's solution containing (in mM): 150 NaCl, 5.4 KCl, 1.2 MgCl<sub>2</sub>, 10 glucose, 2 Na-pyruvate, 1 CaCl<sub>2</sub> and 5 HEPES, pH 7.4. They were paced at 0.2 Hz and fractional shortening data was collected using edge detection (Crescent Electronics).

#### *Real-time PCR*

RNA Primer pairs were designed with Primer-3 software and all had an optimal annealing temperature at 61 °C. The housekeeping gene 18S rRNA was used as an internal standard for gene expression screening. RT-PCR primers were synthesized by Sigma-Aldrich (Milan, Italy).

Figure 1

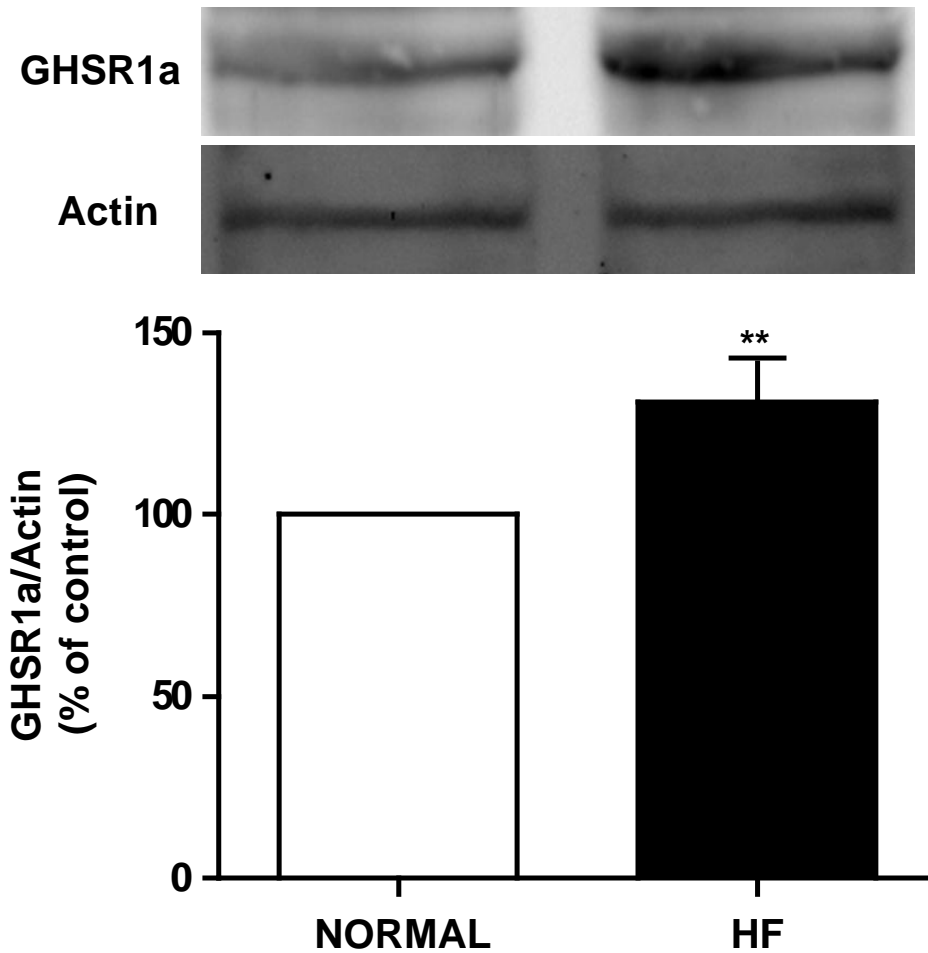

Figure Legends

**Figure 1.** Ghrelin receptor (GHSR-1a) protein expression determined by Western blot in normal and HF heart samples. The bar graph represents the densitometric quantification of GHSR-1a normalized to total proteins and reported as percent of control ( n=3 per group, P<0.05 vs. normal).
